# Supplementary material for: NO2 Physical-to-Chemical Adsorption Transition on Janus WSSe Monolayers Realized by Defect Introduction
Source: MDPI journal article supplement (doi:10.3390/molecules28041644), 2023-02-08
Supplement: s1 [file s1]

## Supporting information

### **NO<sub>2</sub> physical-to-chemical adsorption transition on Janus WSSe monolayers realized by defect introduction**

Lin Ju<sup>1,\*</sup>, Xiao Tang<sup>2</sup>, Xiaoxi Li<sup>1</sup>, Bodian Liu<sup>1</sup>, Xiaoya Qiao<sup>1</sup>, Zhi Wang<sup>1</sup>, and Huabing Yin<sup>3,\*</sup>

<sup>1</sup>School of Physics and Electric Engineering, Anyang Normal University, Anyang, 455000, China

<sup>2</sup>College of Science, Institute of Materials Physics and Chemistry, Nanjing Forestry University, Nanjing 210037, China

<sup>3</sup>Joint Center for Theoretical Physics, and Institute for Computational Materials Science, School of Physics and Electronics, Henan University, Kaifeng 475004, China.

Correspondence: julin@aynu.edu.cn (L.J.); yhb@henu.edu.cn (H.Y.)

**KEYWORDS:** *gas sensing, WSSe monolayer, Se vacancy, density functional theory*

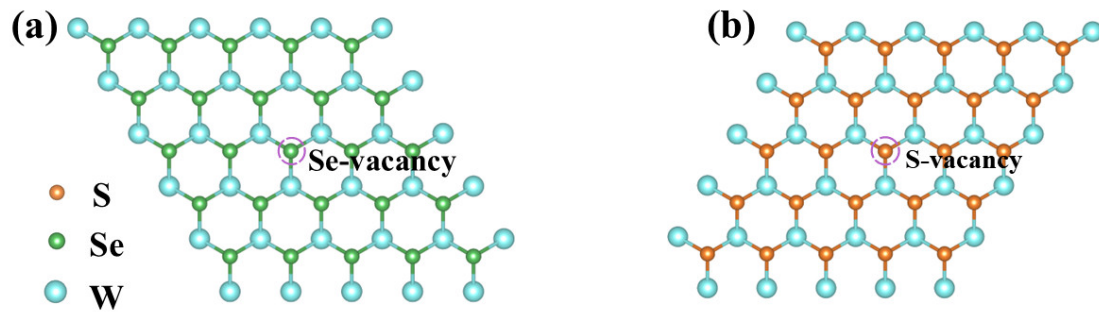

**Figure S1.** The location of Se (a) and S vacancy defects (b) considered in our study, which is circled by purple dashed line.

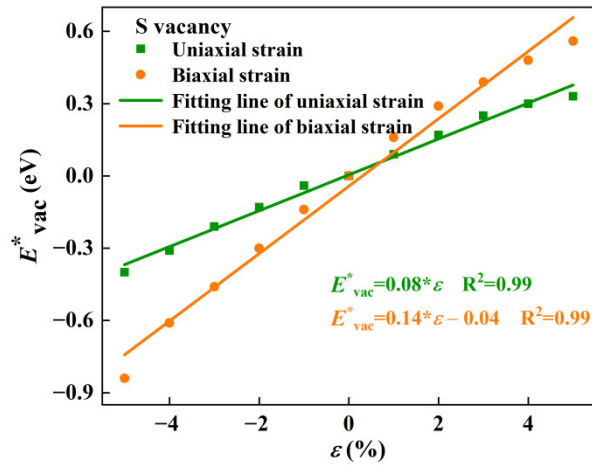

**Figure S2.** The relative  $E_{vac}^*$  of S vacancy under the different uniaxial (blue) and biaxial strains (orange). The value of  $E_{vac}^*$  under no strain is selected as a reference value.

**Table S1.** The adsorption energy of NO<sub>2</sub> gas molecules on pristine and defective Janus WSSe monolayer.

| WSSe      | Adsorption energy |
|-----------|-------------------|
| Pristine  | -0.56 eV          |
| Defective | -3.53 eV          |

**Table S2.** The calculated charge of one Se atom from Janus WSSe monolayer under -10% , 0 and 10% strain.

| Strain | Charge        |
|--------|---------------|
| -10%   | 6.41 <i>e</i> |
| 0      | 6.44 <i>e</i> |
| 10%    | 6.46 <i>e</i> |
